# Supplementary material for: Species delimitation and mitonuclear discordance within a species complex of biting midges
Source: PubMed Central journal article supplement (PMC8810881; doi:10.1038/s41598-022-05856-x), 2022-02-02
Supplement: 41598_2022_5856_MOESM1_ESM.pdf [file 41598_2022_5856_MOESM1_ESM.pdf]

**Supplemental Table 1.** Genotypic frequencies for each sample were compared using a log-likelihood (G)-based test of differentiation using Genepop version 4.7.0. Pairwise  $F_{ST}$  values between populations are listed below the diagonal and those found to be statistically similar are bolded ( $p > 0.05$ ). Populations are listed as: species abbreviation\_collecting site (Table 1). alb = *C. albertensis*, occ = *C. occidentalis*, son = *C. sonorensis*, var = *C. variipennis*.

| sp_pop   | alb_COFC      | alb_KSMA      | alb_ON        | alb_SD | occ_BC        | occ_CACL | occ_NV | occ_UT | son_AZ         | son_CACL      | son_CO        | son_ID        | son_KSMA      | son_TX        | son_UT | var_FL        | var_KSMA      | var_ON        | var_SC |
|----------|---------------|---------------|---------------|--------|---------------|----------|--------|--------|----------------|---------------|---------------|---------------|---------------|---------------|--------|---------------|---------------|---------------|--------|
| alb_COFC | -             |               |               |        |               |          |        |        |                |               |               |               |               |               |        |               |               |               |        |
| alb_KSMA | <b>0.0233</b> | -             |               |        |               |          |        |        |                |               |               |               |               |               |        |               |               |               |        |
| alb_ON   | <b>0.1240</b> | <b>0.2119</b> | -             |        |               |          |        |        |                |               |               |               |               |               |        |               |               |               |        |
| alb_SD   | <b>0.0143</b> | <b>0.0412</b> | <b>0.1926</b> | -      |               |          |        |        |                |               |               |               |               |               |        |               |               |               |        |
| occ_BC   | 0.7114        | 0.7871        | 0.7222        | 0.7702 | -             |          |        |        |                |               |               |               |               |               |        |               |               |               |        |
| occ_CACL | 0.7004        | 0.7614        | 0.7021        | 0.7536 | 0.3146        | -        |        |        |                |               |               |               |               |               |        |               |               |               |        |
| occ_NV   | 0.7268        | 0.7674        | 0.7253        | 0.7642 | <b>0.1091</b> | 0.2511   | -      |        |                |               |               |               |               |               |        |               |               |               |        |
| occ_UT   | 0.7132        | 0.7733        | 0.7210        | 0.7654 | 0.2770        | 0.3021   | 0.1827 | -      |                |               |               |               |               |               |        |               |               |               |        |
| son_AZ   | 0.7073        | 0.7378        | 0.7050        | 0.7408 | 0.7521        | 0.7471   | 0.7649 | 0.7592 | -              |               |               |               |               |               |        |               |               |               |        |
| son_CACL | 0.6727        | 0.7131        | 0.6641        | 0.7250 | 0.7311        | 0.7254   | 0.7482 | 0.7406 | <b>0.0356</b>  | -             |               |               |               |               |        |               |               |               |        |
| son_CO   | 0.6835        | 0.7155        | 0.6793        | 0.7243 | 0.7382        | 0.7312   | 0.7553 | 0.7462 | <b>-0.0002</b> | <b>0.0268</b> | -             |               |               |               |        |               |               |               |        |
| son_ID   | 0.6898        | 0.7274        | 0.6870        | 0.7342 | 0.7446        | 0.7357   | 0.7578 | 0.7507 | <b>-0.0002</b> | <b>0.0107</b> | <b>0.0011</b> | -             |               |               |        |               |               |               |        |
| son_KSMA | 0.7057        | 0.7325        | 0.7045        | 0.7362 | 0.7514        | 0.7440   | 0.7636 | 0.7575 | <b>0.0173</b>  | <b>0.0647</b> | <b>0.0244</b> | <b>0.0300</b> | -             |               |        |               |               |               |        |
| son_TX   | 0.6966        | 0.7522        | 0.6968        | 0.7532 | 0.7770        | 0.7638   | 0.7796 | 0.7766 | <b>0.0153</b>  | <b>0.0212</b> | <b>0.0220</b> | <b>0.0011</b> | <b>0.0297</b> | -             |        |               |               |               |        |
| son_UT   | 0.6895        | 0.7309        | 0.6876        | 0.7387 | 0.7461        | 0.7396   | 0.7605 | 0.7528 | <b>0.0140</b>  | <b>0.0504</b> | <b>0.0230</b> | <b>0.0078</b> | <b>0.0368</b> | <b>0.0180</b> | -      |               |               |               |        |
| var_FL   | 0.6222        | 0.7103        | <b>0.5464</b> | 0.6971 | 0.7828        | 0.7489   | 0.7657 | 0.7710 | 0.7292         | 0.6958        | 0.7060        | 0.7167        | 0.7282        | 0.7341        | 0.7204 | -             |               |               |        |
| var_KSMA | 0.6256        | 0.6965        | 0.5586        | 0.6841 | 0.7783        | 0.7541   | 0.7707 | 0.7708 | 0.7431         | 0.7143        | 0.7200        | 0.7332        | 0.7397        | 0.7533        | 0.7374 | <b>0.0759</b> | -             |               |        |
| var_ON   | 0.6116        | 0.6729        | 0.5269        | 0.6723 | 0.7632        | 0.7406   | 0.7645 | 0.7602 | 0.7269         | 0.6907        | 0.7016        | 0.7131        | 0.7249        | 0.7270        | 0.7166 | <b>0.0136</b> | <b>0.0146</b> | -             |        |
| var_SC   | 0.6786        | 0.7206        | 0.6116        | 0.7103 | 0.7868        | 0.7681   | 0.7826 | 0.7832 | 0.7595         | 0.7423        | 0.7444        | 0.7555        | 0.7553        | 0.7722        | 0.7593 | <b>0.0826</b> | <b>0.0311</b> | <b>0.0255</b> | -      |
| CASD     | 0.7185        | 0.7548        | 0.7164        | 0.7539 | 0.7550        | 0.7444   | 0.7527 | 0.7549 | 0.7324         | 0.7158        | 0.7220        | 0.7284        | 0.7310        | 0.7461        | 0.7324 | 0.7414        | 0.7348        | 0.7294        | 0.7500 |

**Supplemental Table 2.** Comparison of pairwise genetic distances within and between species. Rousset's distance (aR) measures the genetic differentiation among individuals rather than the differentiation between populations (pairwise Fst), and Loiselle's kinship coefficient (LKC) is a measure of genetic dissimilarity.

**Pairwise Rousset's distance between individuals (aR; 'a' in Rousset, 2000)**

| Species                | <i>C. albertensis</i> | <i>C. occidentalis</i> | <i>C. sonorensis</i> | <i>C. variipennis</i> | CASD   |
|------------------------|-----------------------|------------------------|----------------------|-----------------------|--------|
| <i>C. albertensis</i>  | 0.8966                | -                      | -                    | -                     | -      |
| <i>C. occidentalis</i> | 5.0278                | 0.8129                 | -                    | -                     | -      |
| <i>C. sonorensis</i>   | 5.1911                | 5.6082                 | 0.8405               | -                     | -      |
| <i>C. variipennis</i>  | 3.8555                | 5.4976                 | 5.4020               | 0.5080                | -      |
| CASD                   | 4.8716                | 4.8380                 | 4.9001               | 4.7081                | 0.4706 |

**Pairwise KINSHIP coefficients (LKC)**

| Species                | <i>C. albertensis</i> | <i>C. occidentalis</i> | <i>C. sonorensis</i> | <i>C. variipennis</i> | CASD   |
|------------------------|-----------------------|------------------------|----------------------|-----------------------|--------|
| <i>C. albertensis</i>  | 0.8122                | -                      | -                    | -                     | -      |
| <i>C. occidentalis</i> | -0.0014               | 0.8800                 | -                    | -                     | -      |
| <i>C. sonorensis</i>   | -0.2800               | -0.3349                | 0.3594               | -                     | -      |
| <i>C. variipennis</i>  | 0.2058                | -0.0934                | -0.3243              | 0.8754                | -      |
| CASD                   | 0.0227                | 0.0544                 | -0.2106              | 0.0492                | 0.9255 |

**Pairwise Fst (Table 2)**

| Species                | <i>C. albertensis</i> | <i>C. occidentalis</i> | <i>C. sonorensis</i> | <i>C. variipennis</i> | CASD |
|------------------------|-----------------------|------------------------|----------------------|-----------------------|------|
| <i>C. albertensis</i>  | 0.0550                | -                      | -                    | -                     | -    |
| <i>C. occidentalis</i> | 0.7070                | 0.4110                 | -                    | -                     | -    |
| <i>C. sonorensis</i>   | 0.7090                | 0.7300                 | 0.0290               | -                     | -    |
| <i>C. variipennis</i>  | 0.6540                | 0.7470                 | 0.7300               | 0.0260                | -    |
| CASD                   | 0.7140                | 0.7190                 | 0.7060               | 0.7340                | -    |

**Supplemental Table 3.** Genetic diversity based on SNP data for all species and within collection sites by species. The inbreeding coefficient ( $F_{IS}$ ), expected heterozygosity ( $H_e$ ), and observed heterozygosity ( $H_o$ ) were calculated in Genepop v.4.7.0. Private alleles were identified using populations v.2.41.

| Species                | N  | $F_{IS}$ | $H_e$  | $H_o$  | Private Alleles |
|------------------------|----|----------|--------|--------|-----------------|
| <i>C. albertensis</i>  | 22 | 0.4240   | 0.1020 | 0.0587 | 11              |
| <i>C. occidentalis</i> | 36 | 0.4989   | 0.0936 | 0.0469 | 28              |
| <i>C. sonorensis</i>   | 94 | 0.4254   | 0.0973 | 0.0559 | 56              |
| <i>C. variipennis</i>  | 29 | 0.3084   | 0.0850 | 0.0588 | 13              |
| San Diego pop          | 15 | 0.3719   | 0.0790 | 0.0496 | 31              |

***C. albertensis***

| Populations | N | $F_{IS}$ | $H_e$  | $H_o$  |
|-------------|---|----------|--------|--------|
| CO          | 8 | 0.5914   | 0.2868 | 0.1172 |
| KS          | 3 | 0.3294   | 0.2488 | 0.1669 |
| ON          | 3 | 0.4638   | 0.2851 | 0.1529 |
| SD          | 8 | 0.4748   | 0.2720 | 0.1429 |

***C. occidentalis***

| Populations | N  | $F_{IS}$ | $H_e$  | $H_o$  |
|-------------|----|----------|--------|--------|
| BC          | 5  | 0.3344   | 0.2007 | 0.1336 |
| CA          | 8  | 0.6018   | 0.1891 | 0.0753 |
| NV          | 15 | 0.3935   | 0.2401 | 0.1456 |
| UT          | 7  | 0.3929   | 0.2250 | 0.1366 |

***C. sonorensis***

| Populations | N  | $F_{IS}$ | $H_e$  | $H_o$  |
|-------------|----|----------|--------|--------|
| AZ          | 17 | 0.4141   | 0.2701 | 0.1583 |
| CA          | 11 | 0.6839   | 0.2559 | 0.0809 |
| CO          | 13 | 0.4465   | 0.2776 | 0.1536 |
| ID          | 14 | 0.6567   | 0.2503 | 0.0859 |
| KS          | 23 | 0.4036   | 0.2710 | 0.1616 |
| TX          | 8  | 0.7639   | 0.2474 | 0.0584 |
| UT          | 8  | 0.4493   | 0.2686 | 0.1479 |

***C. variipennis***

| Populations | N  | $F_{IS}$ | $H_e$  | $H_o$  |
|-------------|----|----------|--------|--------|
| FL          | 3  | 0.6149   | 0.2739 | 0.1055 |
| KS          | 5  | 0.3311   | 0.2767 | 0.1851 |
| ON          | 5  | 0.4780   | 0.2862 | 0.1494 |
| SC          | 16 | 0.3418   | 0.2776 | 0.1827 |

**Supplemental Table 4.** Pairwise  $F_{ST}$  values between populations of each species estimated in Genepop v.4.7.0. Population abbreviations can be found in Table 1.

***C. albertensis***

| Populations | CO      | KS     | ON     |
|-------------|---------|--------|--------|
| CO          | -       | -      | -      |
| KS          | -0.0085 | -      | -      |
| ON          | 0.0912  | 0.1161 | -      |
| SD          | 0.0082  | 0.0110 | 0.1089 |

***C. occidentalis***

| Populations | BC     | CA     | NV     |
|-------------|--------|--------|--------|
| BC          | -      | -      | -      |
| CA          | 0.7044 | -      | -      |
| NV          | 0.1430 | 0.4830 | -      |
| UT          | 0.3723 | 0.5689 | 0.2365 |

***C. sonorensis***

| Populations | AZ     | CA     | CO     | ID     | KS     | TX     |
|-------------|--------|--------|--------|--------|--------|--------|
| AZ          | -      | -      | -      | -      | -      | -      |
| CA          | 0.0368 | -      | -      | -      | -      | -      |
| CO          | 0.0062 | 0.0393 | -      | -      | -      | -      |
| ID          | 0.0230 | 0.0213 | 0.0166 | -      | -      | -      |
| KS          | 0.0264 | 0.0686 | 0.0254 | 0.0500 | -      | -      |
| TX          | 0.0267 | 0.0395 | 0.0247 | 0.0183 | 0.0430 | -      |
| UT          | 0.0065 | 0.0362 | 0.0138 | 0.0192 | 0.0365 | 0.0250 |

***C. variipennis***

| Populations | FL      | KS     | ON     |
|-------------|---------|--------|--------|
| FL          | -       | -      | -      |
| KS          | 0.0445  | -      | -      |
| ON          | -0.0059 | 0.0317 | -      |
| SC          | 0.0340  | 0.0276 | 0.0231 |

# K=3

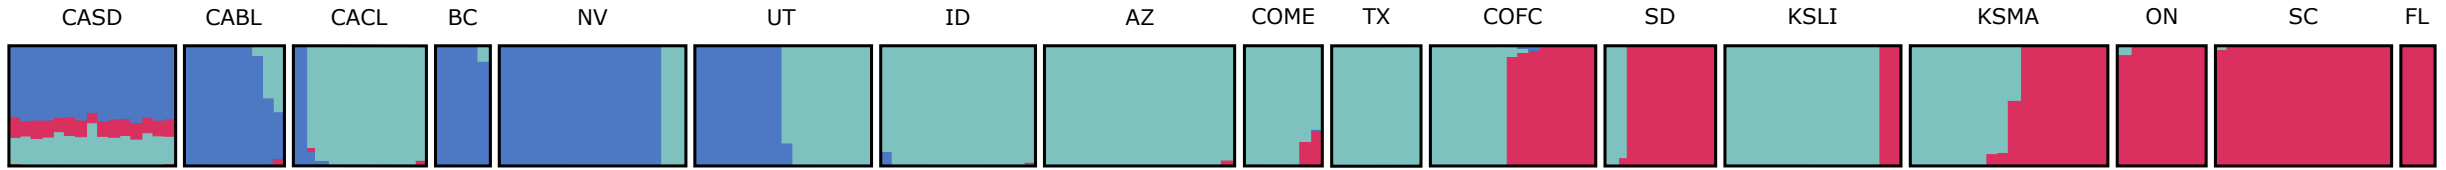

# K=4

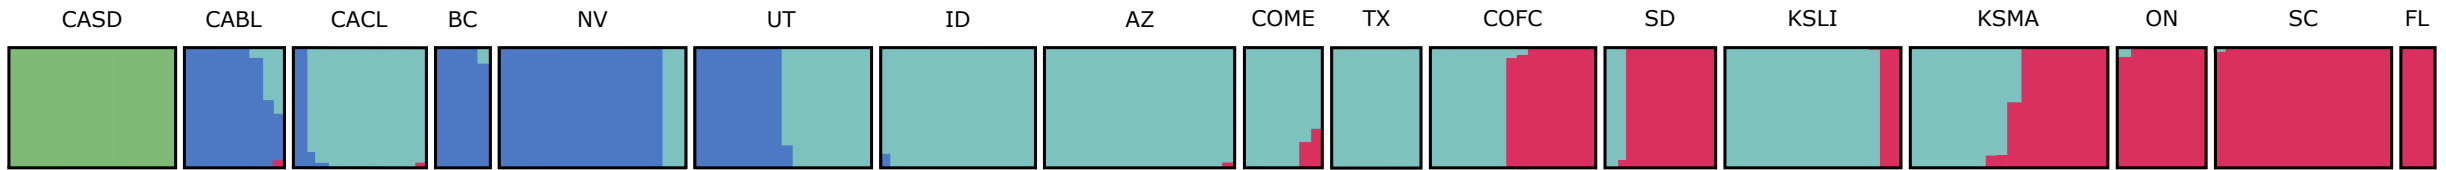

# K=5

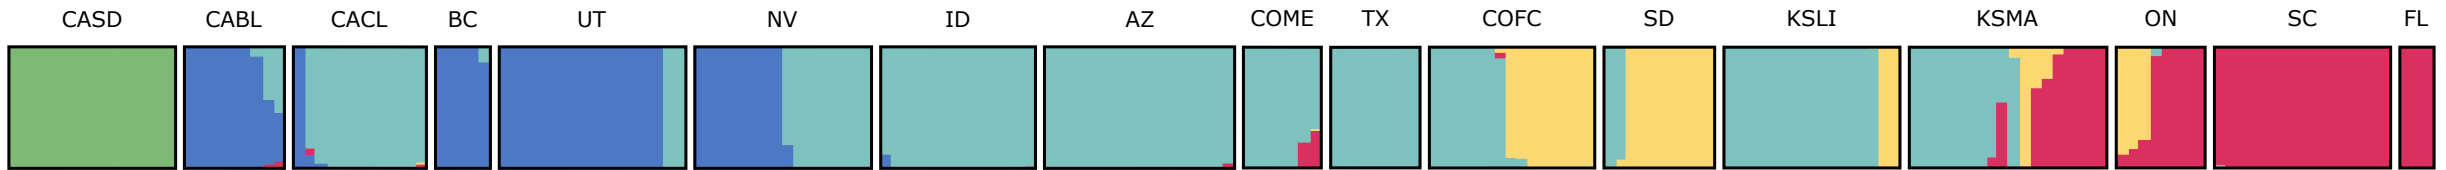

# K=6

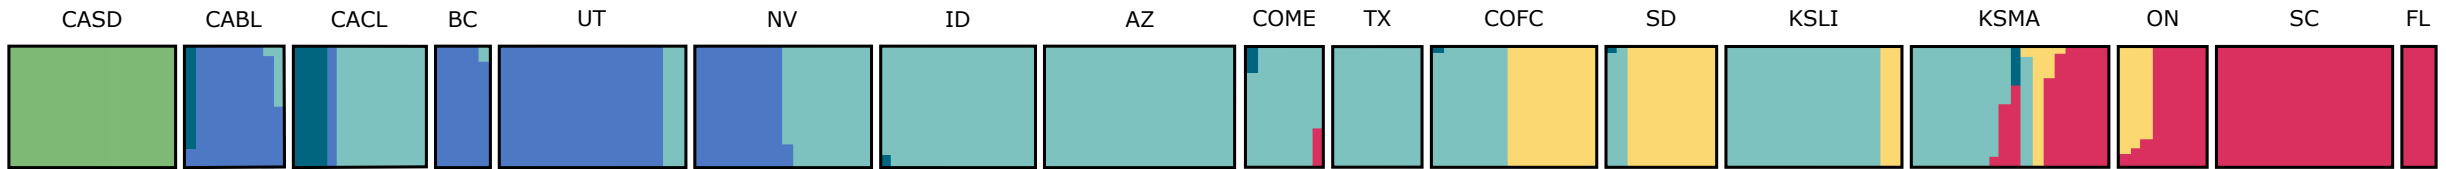

**Supplemental Figure 1.** fastSTRUCTURE results assuming four, five, and six population clusters (K= 3, K=4, K=5, and K=6). Each column represents an individual and are grouped by collection site with each color representing a cluster.

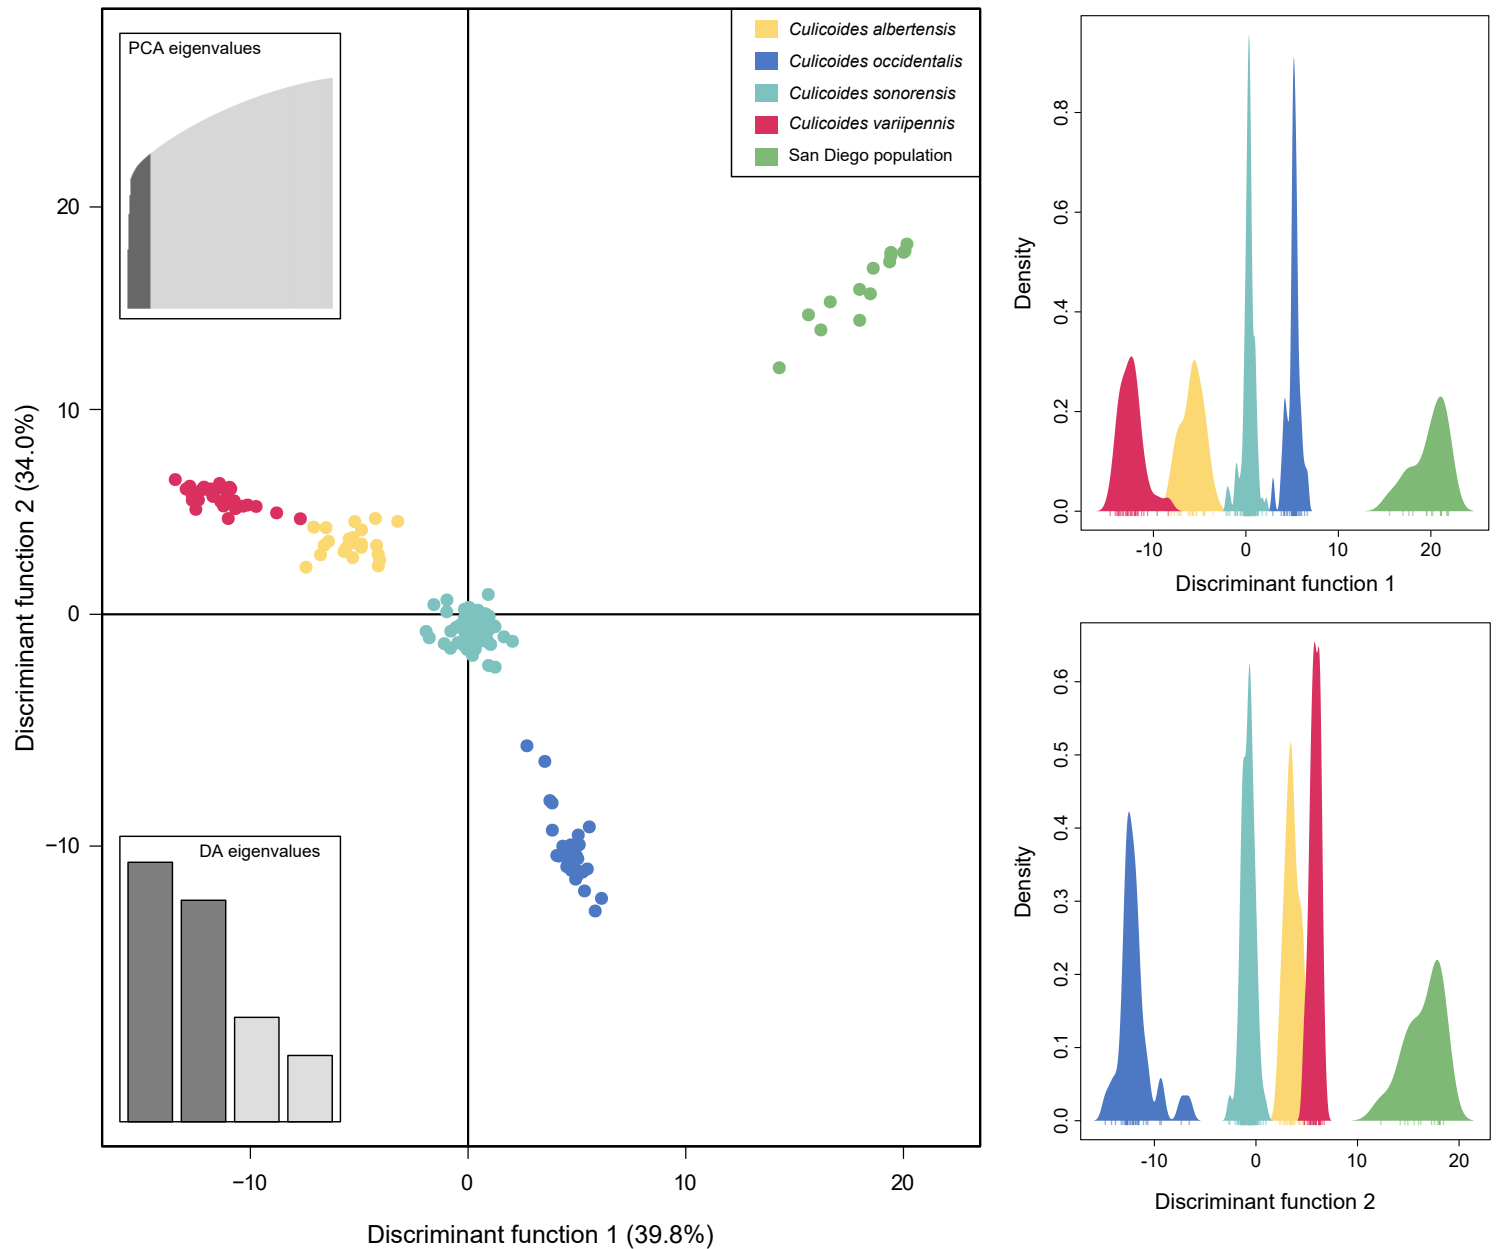

**Supplemental Figure 2.** Individuals are grouped according the Discriminant Analysis of Principal Components (DAPC) with the best support for  $K = 5$  genetic clusters. The DAPC was performed in R using the adegenet package.

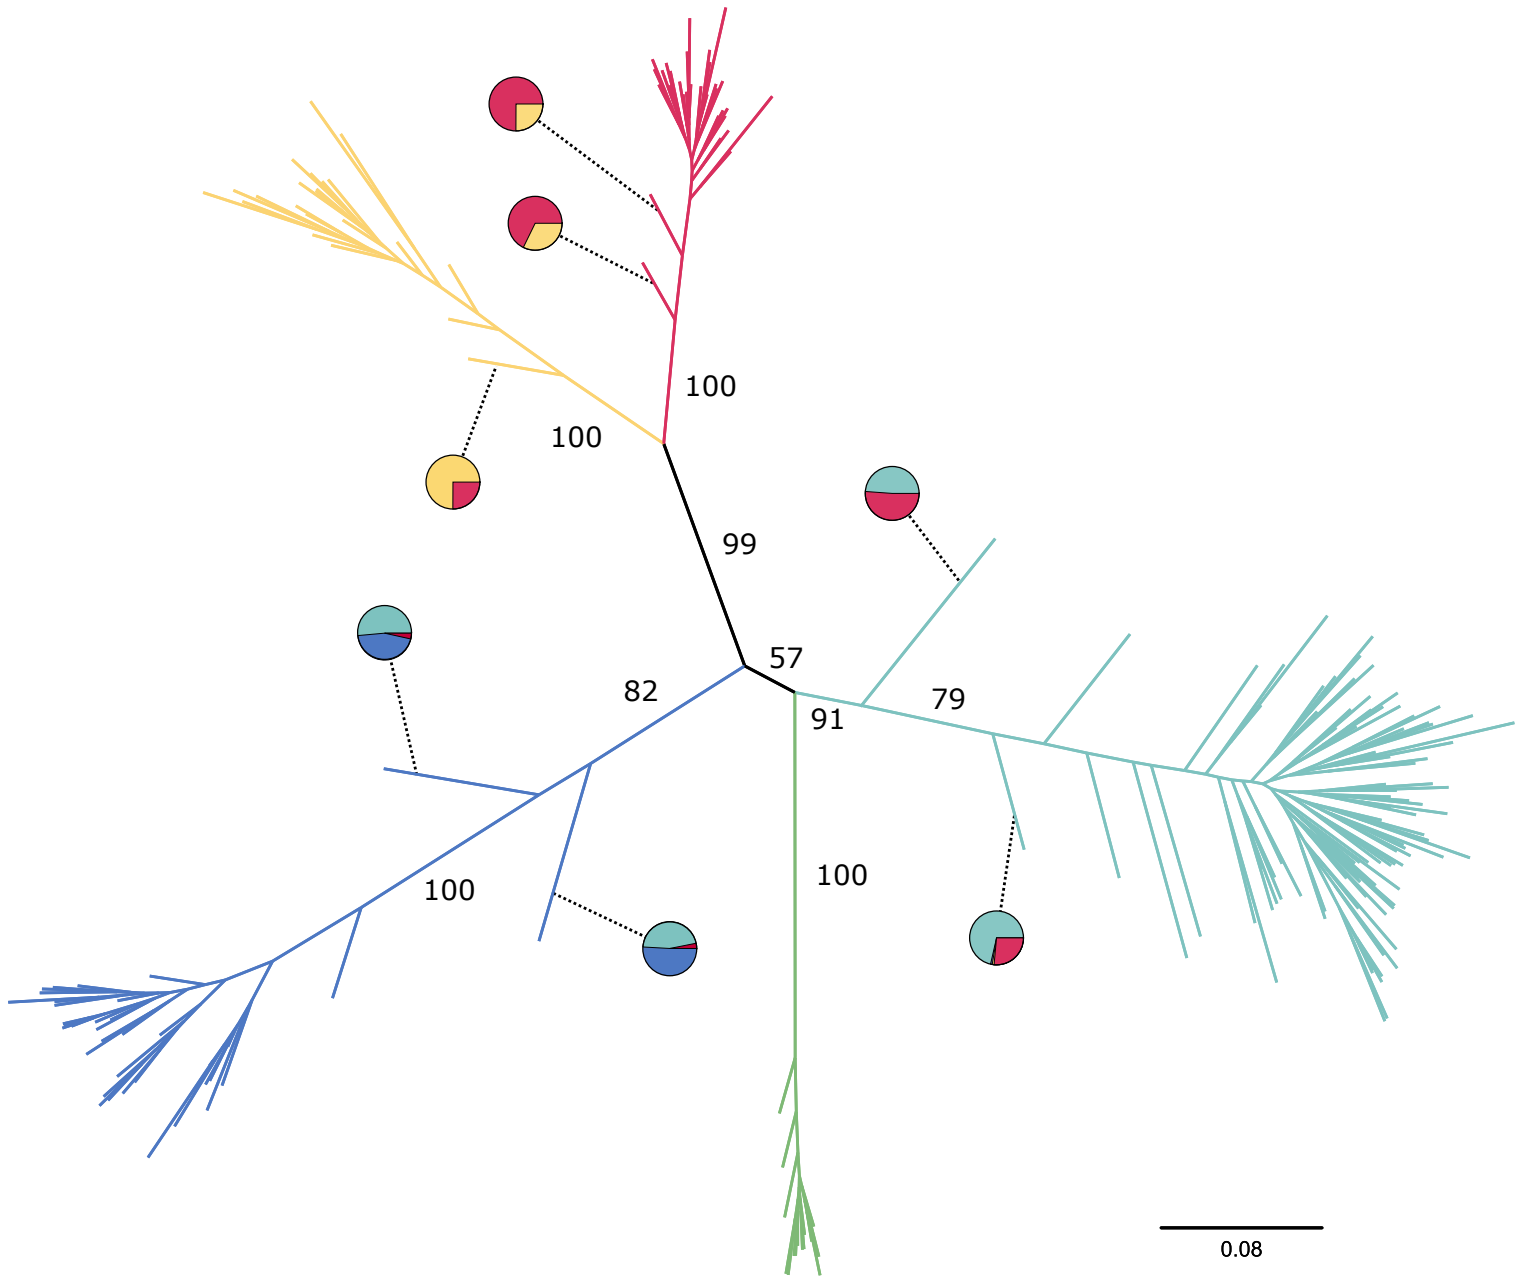

**Supplemental Figure 3.** Unrooted phylogenetic tree based on 206 individuals inferred from 3612 SNPs with the putative hybrids represented. Clade colors represent the putative species inferred from the structure analysis. Bootstrap support values are based on 500 rounds of bootstrapping using RAXML's rapid bootstrapping algorithm, and are shown only if  $\geq 50\%$  and are not shown within species groups.

## *C. albertensis*

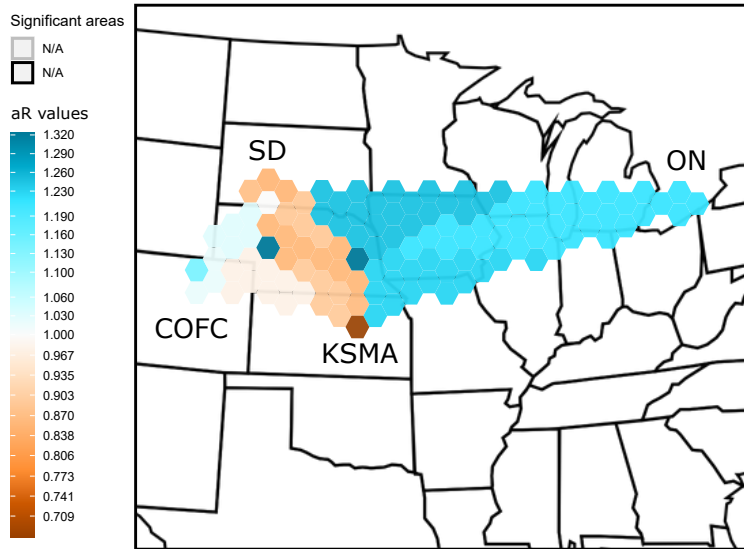

## *C. occidentalis*

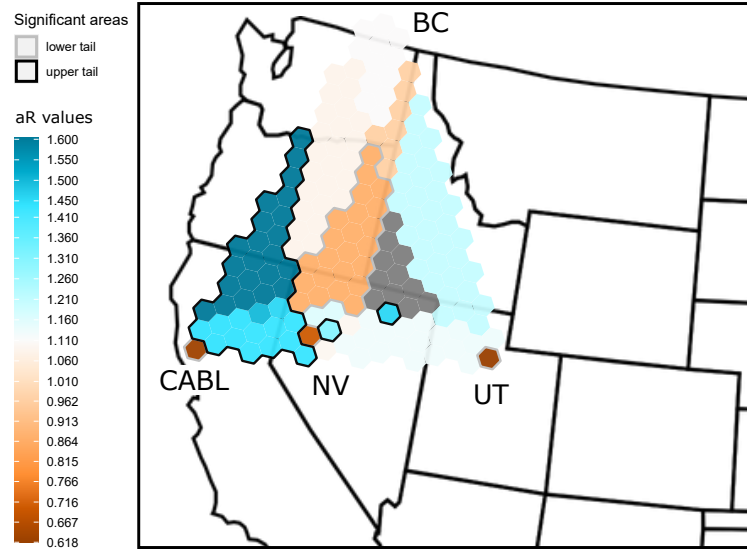

## *C. sonorensis*

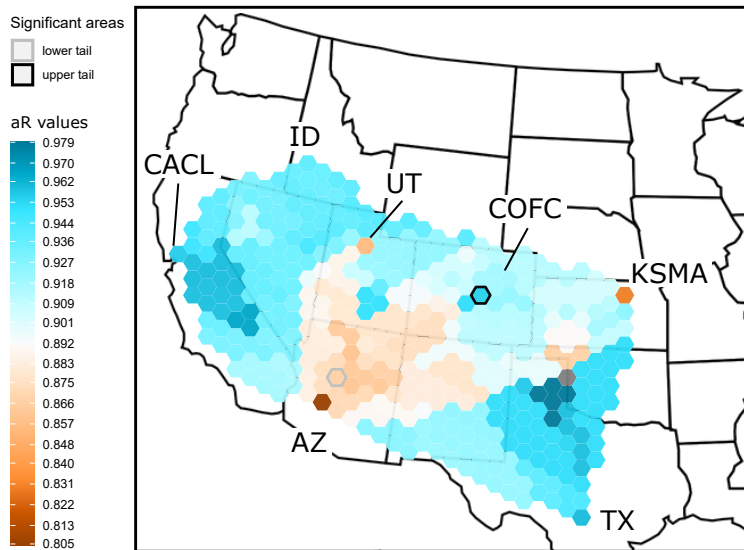

## *C. variipennis*

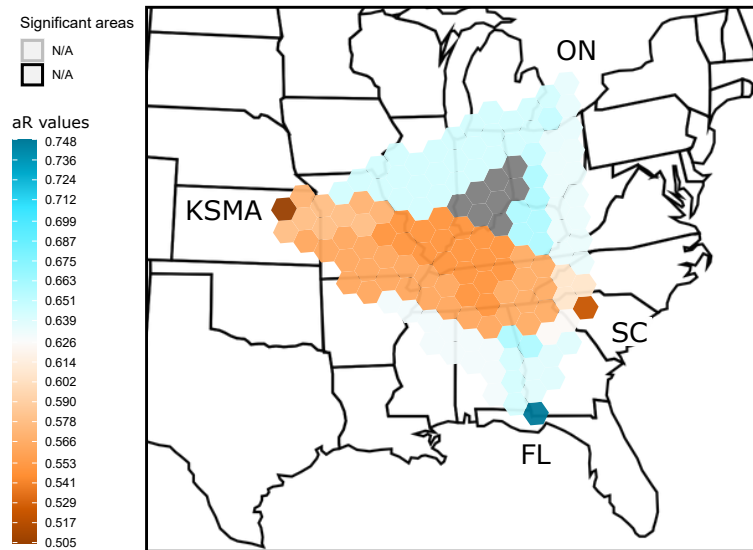

**Supplemental Figure 4.** The spatial variation in the degree of dissimilarity between individuals were mapped for each species using MAPI. Areas of significantly higher and lower levels of gentic dissimilarity are outlined in black and grey respectivley.



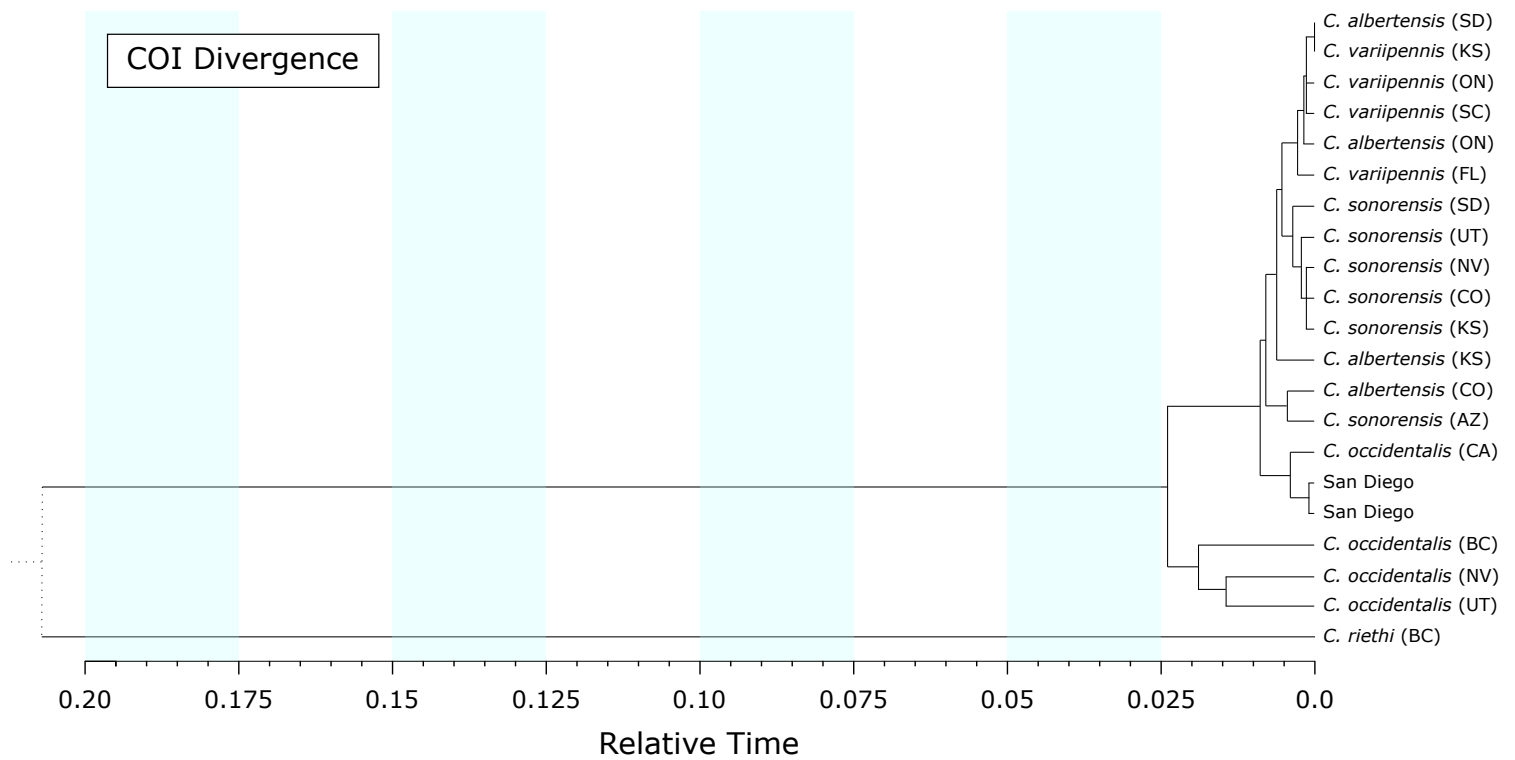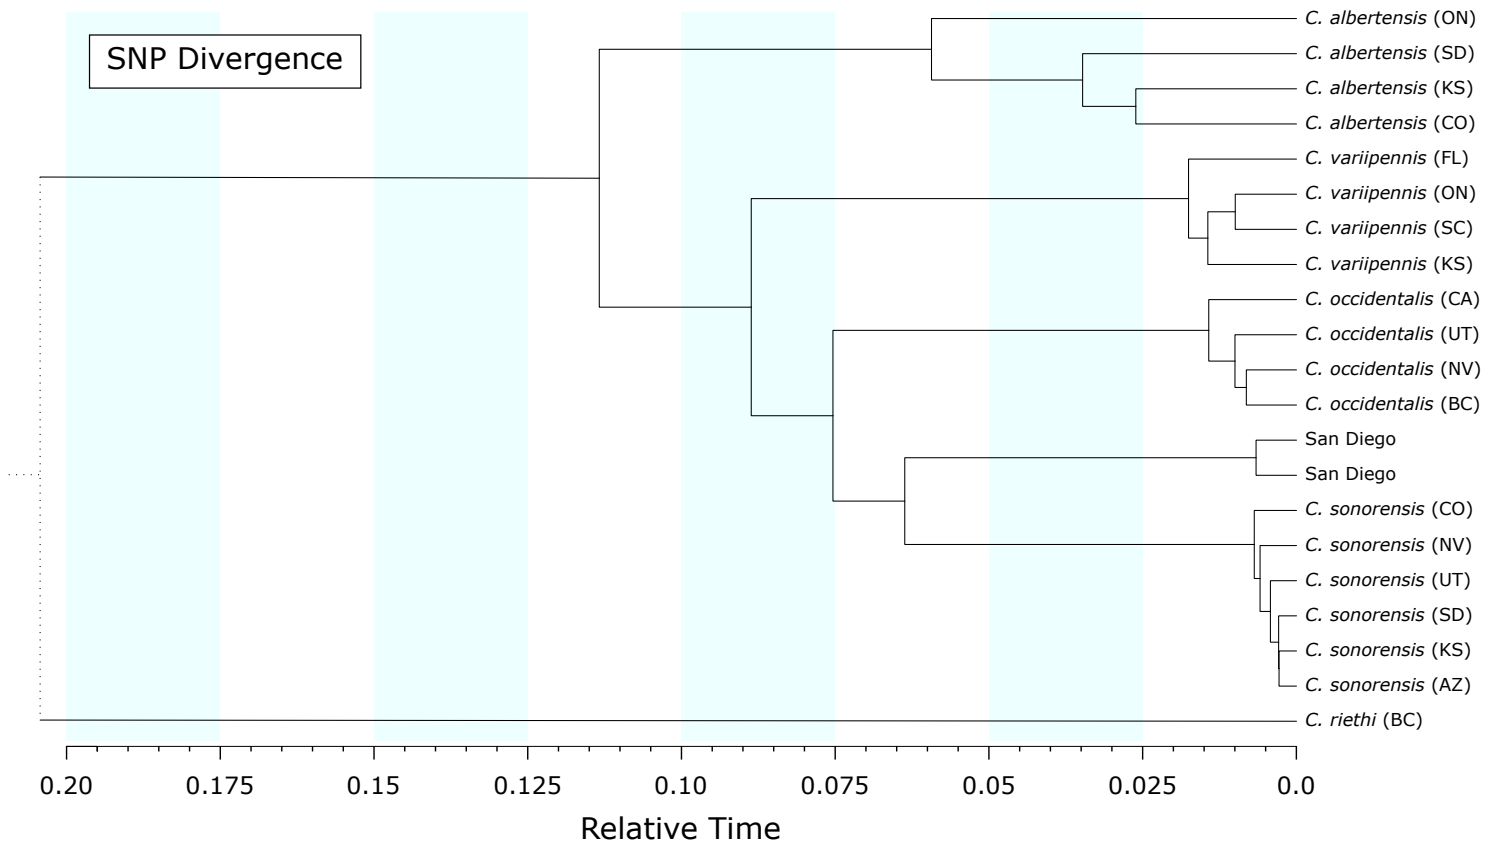

**Supplemental Figure 5.** Time trees for the COI gene and SNP data created using the RealTime method in MEGA. A subset of each species were selected for these analyses with *C. riethi* as the outgroup. Divergence times were estimated using a maximum likelihood method under a GTR+G+I substitution model.

*C. sonorensis*

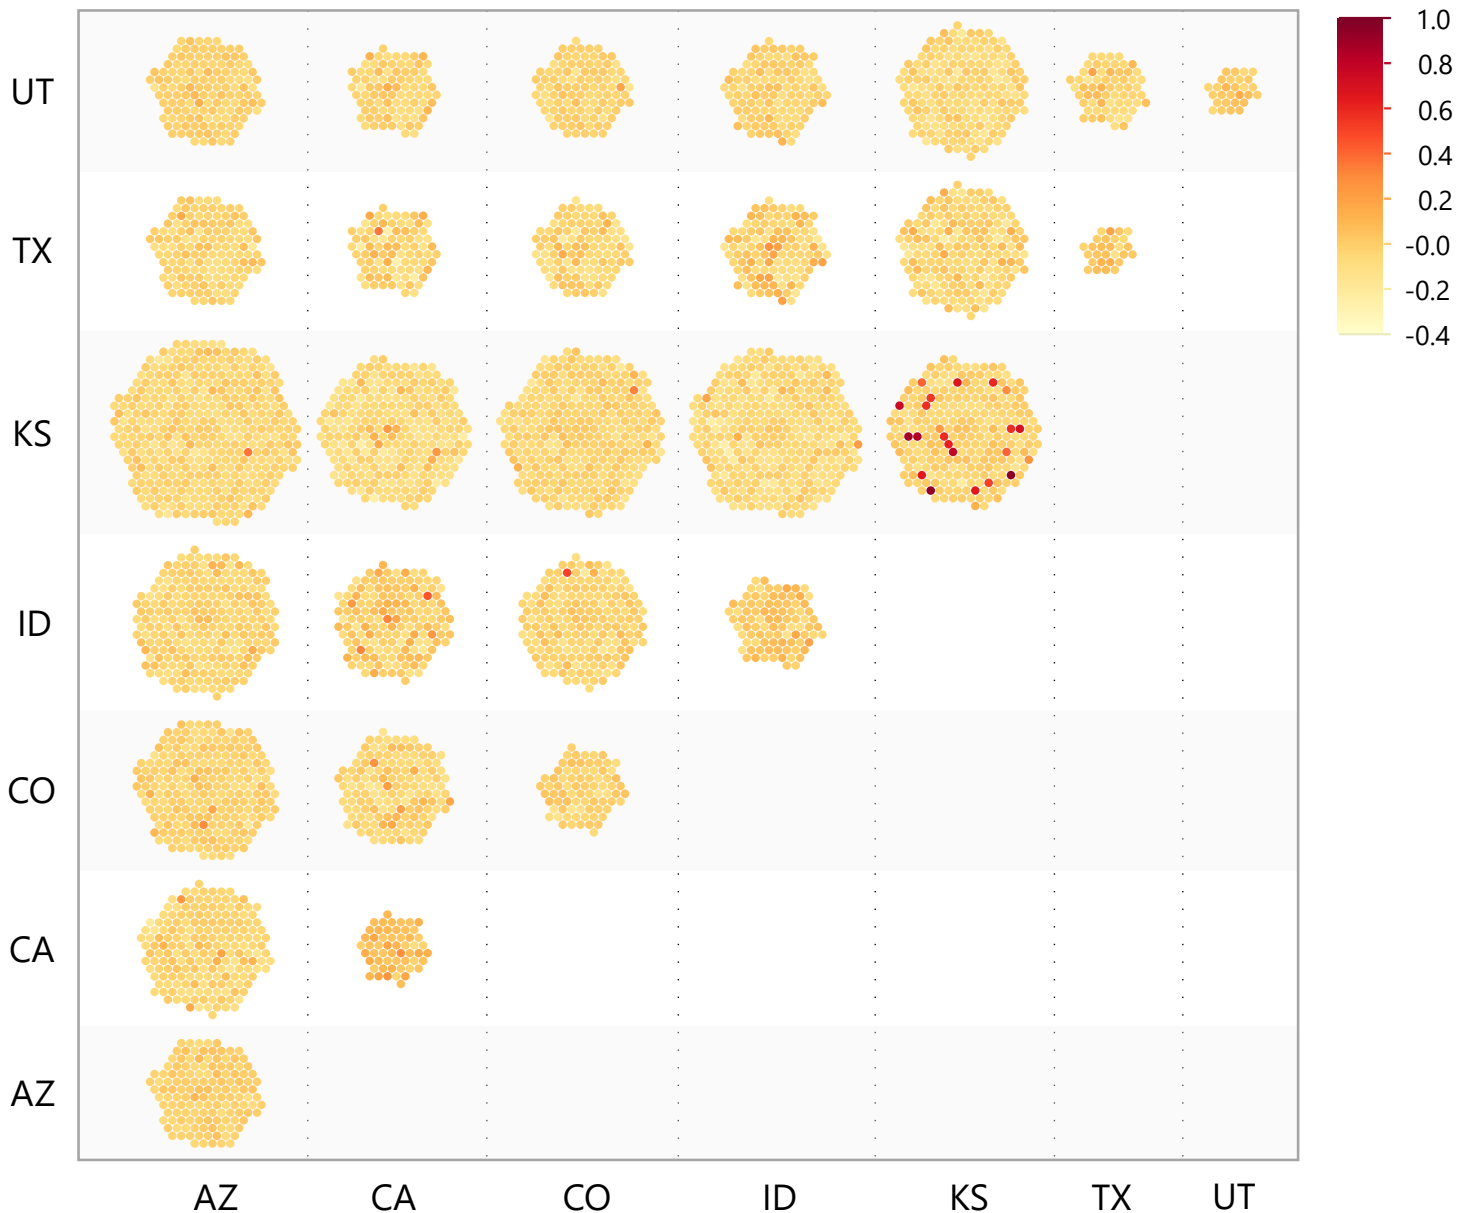

**Supplemental Figure 6.** Maximum likelihood estimation of relatedness between *C. sonorensis* individuals. Each circle represents the relatedness between two individuals compared across two populations (x and y-axis) with the diagonal representing the relatedness within a single population. Pairings with a higher relatedness coefficient score are considered to be more related and are shaded darker. This analysis was performed in R using the “relatedness” package (Laporte and Huard 2017).
